# Supplementary material for: Prediction and prognostic significance of BCAR3 expression in patients with multiple myeloma
Source: Springer Nature journal article supplement (doi:10.1186/s12967-018-1728-8), 2018-12-01

# Additional Figure S1

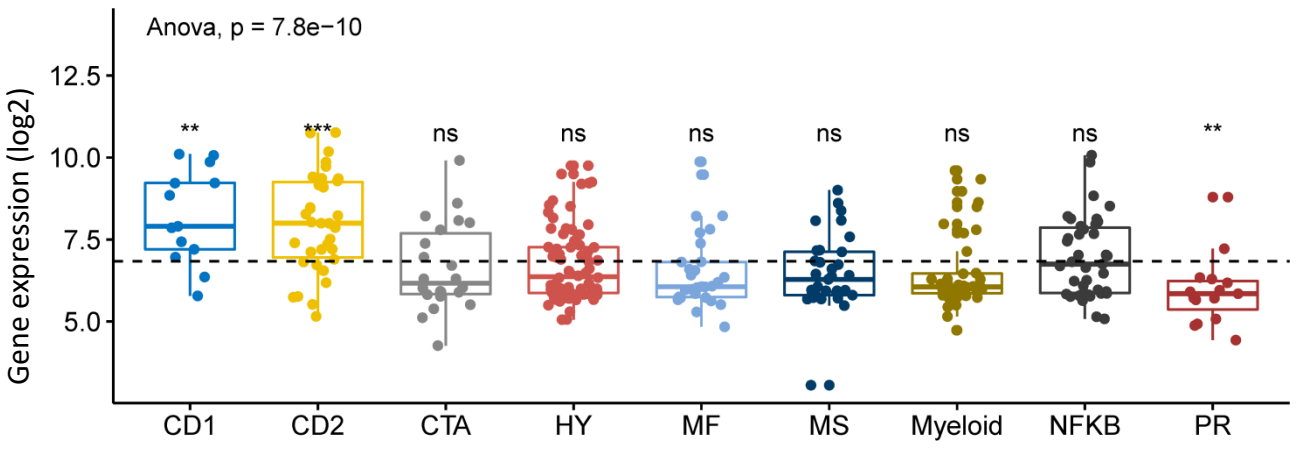

# Additional Figure S2

A

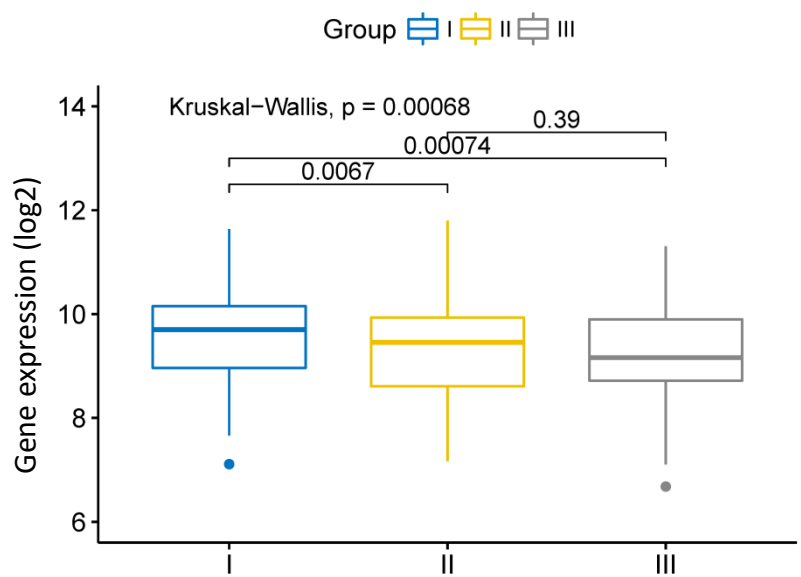

B

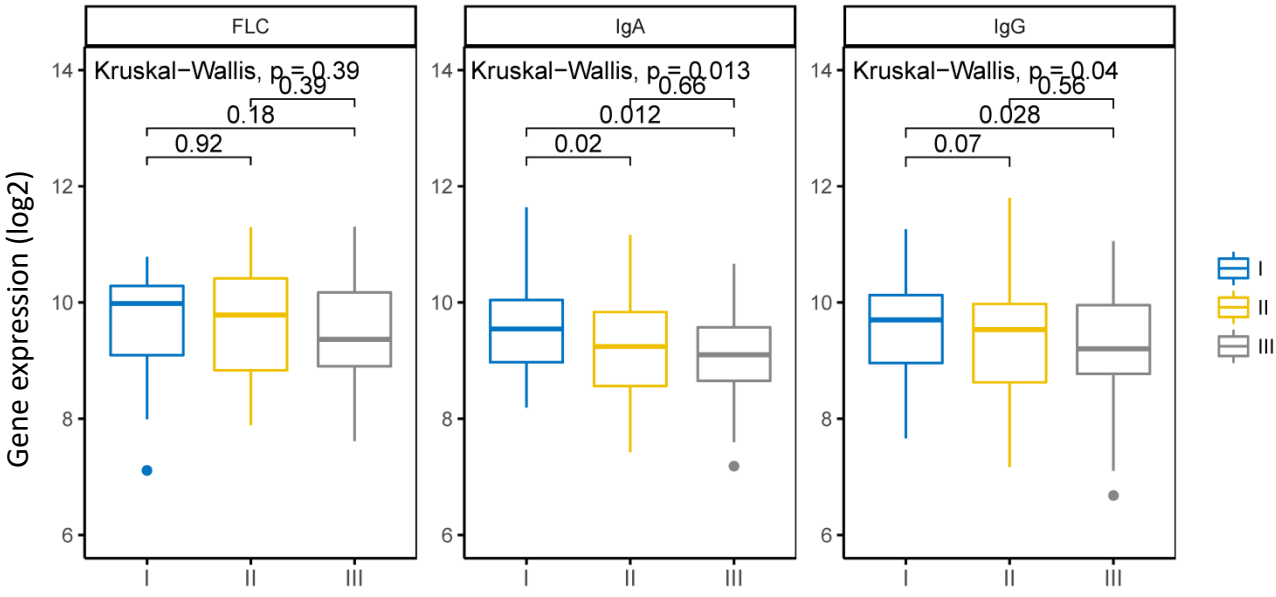

# Additional Figure S3

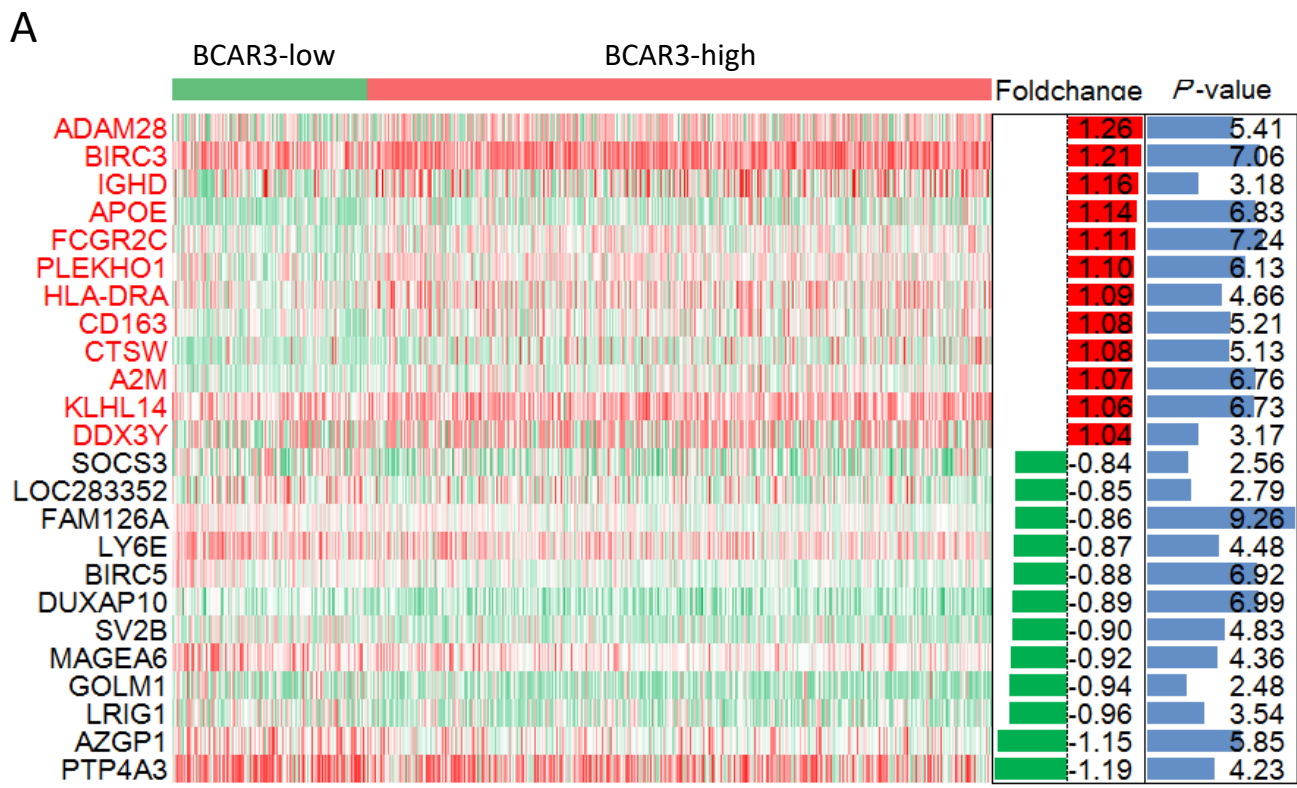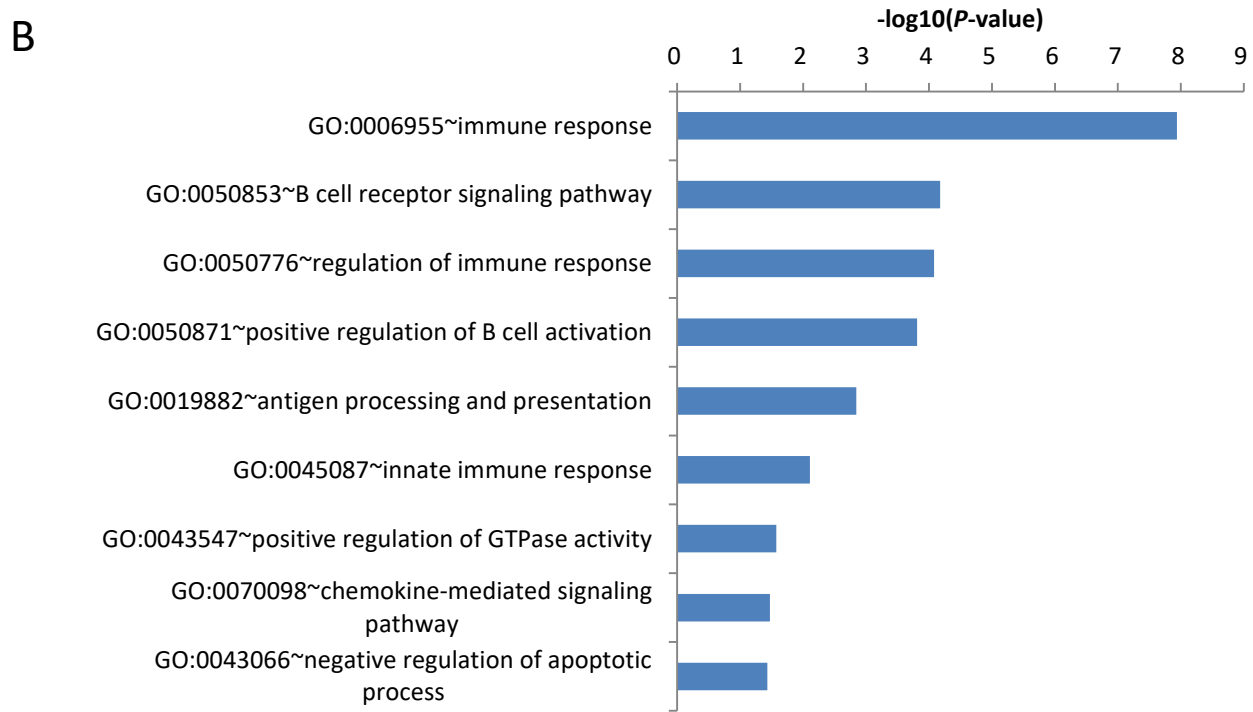

# Additional Figure S4

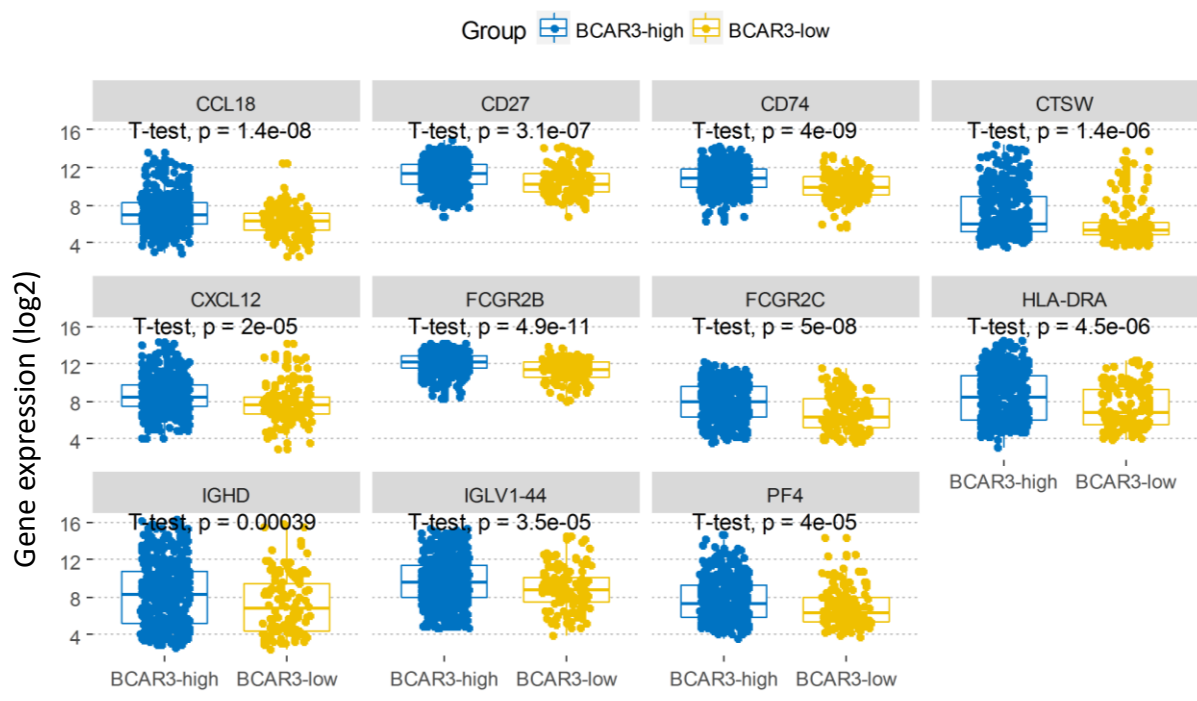

# Additional Figure S5

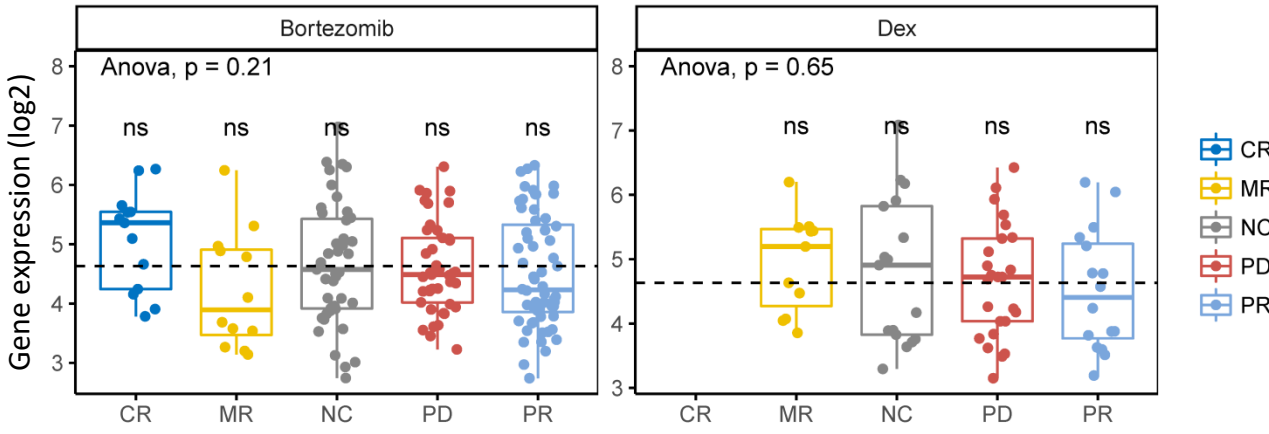

# Additional Figure S6

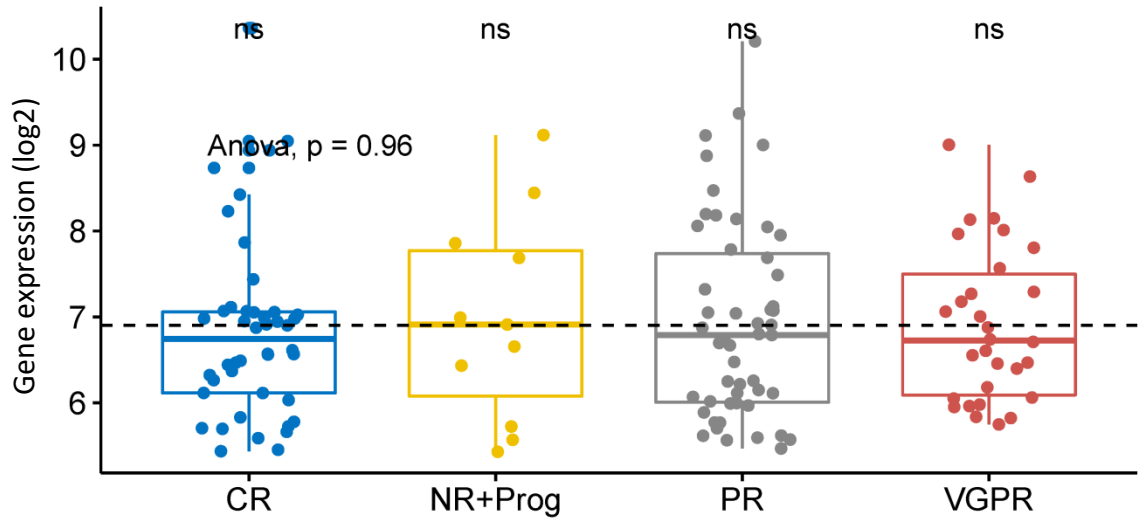

Supplement: MOESM1 [file 16350442]
